# Supplementary material for: Study of two G-protein coupled receptor variants of human trace amine-associated receptor 5
Source: PubMed Central journal article supplement — Sci Rep. 2011 Sep 28;1:102. doi: 10.1038/srep00102 (PMC3216587; doi:10.1038/srep00102), 2011-09-28
Supplement: srep00102-s1.pdf [file srep00102-s1.pdf]

# Supplementary Information

## Study of two G-protein coupled receptor variants of human trace amine-associated receptor 5

Xiaoqiang Wang<sup>1,2</sup>, Karolina Corin<sup>1</sup>, Cyrus Rich<sup>1</sup>, Shuguang Zhang<sup>1\*</sup>

<sup>1</sup>Center for Biomedical Engineering NE47-379, Massachusetts Institute of Technology, 77 Massachusetts Avenue, Cambridge, MA 02139-4307, USA

<sup>2</sup>Center for Bioengineering and Biotechnology, China University of Petroleum (East China), Qingdao, Shandong 266555, China

**Supplementary Table S1 A list of the detergents screened for optimal solubilization of hTAAR5/hTAAR5-T4L expressed in HEK293 cells.**

| #  | Detergent                   | Type <sup>1</sup> | CMC (%) <sup>2</sup> | Conc. <sup>3</sup> | Spot intensity <sup>4</sup> |            |
|----|-----------------------------|-------------------|----------------------|--------------------|-----------------------------|------------|
|    |                             |                   |                      |                    | hTAAR5                      | hTAAR5-T4L |
| 1  | ANAMEG <sup>®</sup> -7      | N                 | 0.65                 | 2%                 | 30618                       | 689136     |
| 2  | ANAPOE <sup>®</sup> -20     | N                 | 0.0072               | 2%                 | 374057                      | 994686     |
| 3  | ANAPOE <sup>®</sup> -35     | N                 | 0.001                | 2%                 | 355730                      | 1.15E+06   |
| 4  | ANAPOE <sup>®</sup> -58     | N                 | 0.00045              | 2%                 | 778246                      | 1.49E+06   |
| 5  | ANAPOE <sup>®</sup> -80     | N                 | 0.0016               | 2%                 | 251668                      | 169450     |
| 6  | ANAPOE <sup>®</sup> -C10E6  | N                 | 0.025                | 2%                 | 772387                      | 1.34E+06   |
| 7  | ANAPOE <sup>®</sup> -C10E9  | N                 | 0.053                | 2%                 | 748110                      | 1.12E+06   |
| 8  | ANAPOE <sup>®</sup> -C12E8  | N                 | 0.0048               | 2%                 | 553667                      | 1.04E+06   |
| 9  | ANAPOE <sup>®</sup> -C12E9  | N                 | 0.003                | 2%                 | 650572                      | 960332     |
| 10 | ANAPOE <sup>®</sup> -C12E10 | N                 | 0.2                  | 2%                 | 690201                      | 1.12E+06   |
| 11 | ANAPOE <sup>®</sup> -C13E8  | N                 | 0.0055               | 2%                 | 775478                      | 2.09E+06   |
| 12 | ANAPOE <sup>®</sup> -X-100  | N                 | 0.015                | 2%                 | 838678                      | 2.65E+06   |
| 13 | ANAPOE <sup>®</sup> -X-114  | N                 | 0.011                | 2%                 | 608554                      | 1.98E+06   |

|    |                                                   |   |          |    |          |          |
|----|---------------------------------------------------|---|----------|----|----------|----------|
| 14 | ANAPOE <sup>®</sup> -X-305                        | N | -        | 2% | 260794   | 1.80E+06 |
| 15 | ANAPOE <sup>®</sup> -X-405                        | N | 0.16     | 2% | 189679   | 1.00E+06 |
| 16 | Big CHAP                                          | N | 0.25     | 2% | 340206   | 1.11E+06 |
| 17 | Big CHAP, deoxy                                   | N | 0.12     | 2% | 232689   | 208108   |
| 18 | CYGLU <sup>®</sup> -3                             | N | 0.86     | 2% | 117273   | 376914   |
| 19 | CYMAL <sup>®</sup> -4                             | N | 0.37     | 2% | 322631   | 1.13E+06 |
| 20 | CYMAL <sup>®</sup> -5                             | N | 0.12     | 2% | 371659   | 1.28E+06 |
| 21 | CYMAL <sup>®</sup> -6                             | N | 0.028    | 2% | 430907   | 1.13E+06 |
| 22 | CYMAL <sup>®</sup> -7                             | N | 0.0099   | 2% | 467208   | 1.45E+06 |
| 23 | 2,6-Dimethyl-4-heptyl- $\beta$ -D-maltopyranoside | N | 1.2      | 2% | 348198   | 855457   |
| 24 | 2-Propyl-1-pentyl maltopyranoside                 | N | 1.9      | 2% | 350728   | 957226   |
| 25 | MEGA-8                                            | N | 2.5      | 2% | 276242   | 1.25E+06 |
| 26 | n-Octyl- $\beta$ -D-glucopyranoside               | N | 0.53     | 2% | 292547   | 1.01E+06 |
| 27 | n-Nonyl- $\beta$ -D-glucopyranoside               | N | 0.2      | 2% | 243281   | 640156   |
| 28 | n-Octyl- $\beta$ -D-maltopyranoside               | N | 0.89     | 2% | 287913   | 1.47E+06 |
| 29 | n-Nonyl- $\beta$ -D-maltopyranoside               | N | 0.28     | 2% | 353671   | 1.46E+06 |
| 30 | n-Decyl- $\alpha$ -D-maltopyranoside              | N | -        | 2% | 328647   | 1.27E+06 |
| 31 | n-Decyl- $\beta$ -D-maltopyranoside               | N | 0.087    | 2% | 353090   | 1.10E+06 |
| 32 | n-Undecyl- $\alpha$ -D-maltopyranoside            | N | 0.029    | 2% | 288165   | 1.63E+06 |
| 33 | n-Undecyl- $\beta$ -D-maltopyranoside             | N | 0.029    | 2% | 390267   | 1.41E+06 |
| 34 | n-Dodecyl- $\alpha$ -D-maltopyranoside            | N | 0.0076   | 2% | 385036   | 913367   |
| 35 | n-Dodecyl- $\beta$ -D-maltopyranoside             | N | 0.0087   | 2% | 381175   | 1.69E+06 |
| 36 | n-Tridecyl- $\beta$ -D-maltopyranoside            | N | 0.0017   | 2% | 527213   | 1.62E+06 |
| 37 | n-Heptyl- $\beta$ -D-thioglucopyranoside          | N | 0.85     | 2% | 294126   | 547516   |
| 38 | n-Octyl- $\beta$ -D-thiomaltopyranoside           | N | 0.4      | 2% | 493796   | 1.36E+06 |
| 39 | n-Nonyl- $\beta$ -D-thiomaltopyranoside           | N | 0.15     | 2% | 474915   | 1.40E+06 |
| 40 | n-Decyl- $\beta$ -D-thiomaltopyranoside           | N | 0.045    | 2% | 376746   | 2.34E+06 |
| 41 | n-Undecyl- $\beta$ -D-thiomaltopyranoside         | N | 0.011    | 2% | 307283   | 1.95E+06 |
| 42 | n-Dodecyl- $\beta$ -D-thiomaltopyranoside         | N | 0.0026   | 2% | 530309   | 2.56E+06 |
| 43 | Hexaethylene glycol mono-octyl ether (C8E6)       | N | 0.39     | 2% | 362365   | 983603   |
| 44 | Octaethylene glycol monododecyl ether (C12E8)     | N | 0.0048   | 2% | 368401   | 1.40E+06 |
| 45 | Pentaethylene glycol monodecyl ether (C10E5)      | N | 0.031    | 2% | 406874   | 1.26E+06 |
| 46 | Tetraethylene glycol mono-octyl ether (C8E4)      | N | 0.25     | 2% | 528097   | 1.23E+06 |
| 47 | Sucrose monododecanoate                           | N | 0.016    | 2% | 384706   | 2.10E+06 |
| 48 | Dimethyldecylphosphine oxide                      | N | 0.1      | 2% | 537270   | 1.44E+06 |
| 49 | HEGA-10                                           | N | 0.26     | 2% | 239260   | 3.49E+06 |
| 50 | NP-40                                             | N | 0.05-0.3 | 2% | 218167   | 1.93E+06 |
| 51 | Digitonin                                         | N | -        | 2% | 521877   | 654752   |
| 52 | Deoxycholic acid, sodium salt                     | A | 0.24     | 2% | 468044   | 4.29E+06 |
| 53 | Sodium cholate                                    | A | 0.41     | 2% | 737516   | 1.77E+06 |
| 54 | FOS-MEA <sup>®</sup> -8                           | A | 0.59     | 2% | 293293   | 1.42E+06 |
| 55 | FOS-MEA <sup>®</sup> -10                          | A | 0.15     | 2% | 295125   | 3.05E+06 |
| 56 | Sodium dodecanoyl sarcosine                       | A | 0.42     | 2% | 1.9E+06  | 5.42E+06 |
| 57 | Decyltrimethylammonium chloride                   | C | 0.07     | 2% | 283045   | 448222   |
| 58 | Dodecyltrimethylammonium chloride                 | C | 0.0012   | 2% | 662877   | 454906   |
| 59 | Hexadecyltrimethylammonium chloride               | C | 0.000102 | 2% | 1.85E+06 | 2.51E+06 |
| 60 | Tetradecyltrimethylammonium chloride              | C | 0.0009   | 2% | 1.47E+06 | 717319   |
| 61 | ANZERGENT <sup>®</sup> 3-10                       | Z | 1.2      | 2% | 424561   | 634566   |
| 62 | ANZERGENT <sup>®</sup> 3-12                       | Z | 0.094    | 2% | 851165   | 2.96E+06 |
| 63 | ANZERGENT <sup>®</sup> 3-14                       | Z | 0.007    | 2% | 2.01E+06 | 1.93E+06 |
| 64 | CHAPS                                             | Z | 0.49     | 2% | 497201   | 1.52E+06 |
| 65 | CHAPSO                                            | Z | 0.5      | 2% | 480125   | 1.06E+06 |
| 66 | C-DODECAFOS <sup>™</sup>                          | Z | 0.77     | 2% | 438576   | 1.67E+06 |

|    |                                                   |   |         |    |          |          |
|----|---------------------------------------------------|---|---------|----|----------|----------|
| 67 | CYCLOFOS™-4                                       | Z | 0.45    | 2% | 291426   | 1.99E+06 |
| 68 | CYCLOFOS™-5                                       | Z | 0.15    | 2% | 512757   | 2.04E+06 |
| 69 | CYCLOFOS™-6                                       | Z | 0.094   | 2% | 1.41E+06 | 2.72E+06 |
| 70 | CYCLOFOS™-7                                       | Z | 0.022   | 2% | 2.13E+06 | 4.38E+06 |
| 71 | FOS-CHOLINE®-9                                    | Z | 1.2     | 2% | 652975   | 2.21E+06 |
| 72 | FOS-CHOLINE®-10                                   | Z | 0.35    | 2% | 508954   | 3.56E+06 |
| 73 | FOS-CHOLINE®-11                                   | Z | 0.062   | 2% | 1.15E+06 | 1.93E+06 |
| 74 | FOS-CHOLINE®-12                                   | Z | 0.047   | 2% | 2.07E+06 | 4.32E+06 |
| 75 | FOS-CHOLINE®-13                                   | Z | 0.027   | 2% | 2.34E+06 | 5.60E+06 |
| 76 | FOS-CHOLINE®-14                                   | Z | 0.0046  | 2% | 2.76E+06 | 5.65E+06 |
| 77 | FOS-CHOLINE®-15                                   | Z | 0.0027  | 2% | 2.92E+06 | 4.91E+06 |
| 78 | FOS-CHOLINE®-16                                   | Z | 0.00053 | 2% | 3.2E+06  | 5.16E+06 |
| 79 | FOS-CHOLINE®-ISO-9                                | Z | 0.99    | 2% | 323143   | 311119   |
| 80 | FOS-CHOLINE®-ISO-11                               | Z | 0.9     | 2% | 285656   | 771092   |
| 81 | FOS-CHOLINE®-ISO-11-6U                            | Z | 0.87    | 2% | 283335   | 237371   |
| 82 | FOS-CHOLINE®-UNSAT-11-10                          | Z | 0.21    | 2% | 1.21E+06 | 3.55E+06 |
| 83 | FOSFEN™-9                                         | Z | 0.014   | 2% | 1.38E+06 | 4.54E+06 |
| 84 | NOPOL-FOS™                                        | Z | 1.4     | 2% | 376439   | 282978   |
| 85 | PMAL™-C8                                          | Z | -       | 2% | 831850   | 261830   |
| 86 | PMAL™-C10                                         | Z | -       | 2% | 539048   | 929154   |
| 87 | n-Decyl-N,N-dimethylglycine                       | Z | 0.46    | 2% | 428334   | 1.39E+06 |
| 88 | n-Dodecyl-N,N-dimethylglycine                     | Z | 0.041   | 2% | 1.44E+06 | 2.99E+06 |
| 89 | n-Dodecyl-β-iminodipropionic acid,monosodium salt | Z | -       | 2% | 3.42E+06 | 5.60E+06 |
| 90 | n-Tetradecyl-N,N-dimethylamine-N-oxide (TDAO)     | Z | 0.0075  | 2% | 2.81E+06 | 3.28E+06 |
| 91 | n-Dodecyl-N,N-dimethylamine-N-oxide (DDAO)        | Z | 0.0023  | 2% | 1.98E+06 | 1.91E+06 |
| 92 | Digitonin (8%) + Cholate (2%)                     | M |         |    | 657521   | 2.43E+06 |
| 93 | CHAPS (6%) + CHS (1.2%) + DDM (10%)               | M |         |    | 345564   | 1.07E+06 |
| 94 | CHAPS (10%) + CHS (2%) + DDM (2%)                 | M |         |    | 223362   | 827653   |
| 95 | CHAPS (10%) + CHS (2%)                            | M |         |    | 308560   | 993897   |
| 96 | CHAPS (10%) + OG (1%)                             | M |         |    | 307931   | 787697   |

1. Detergent type: N (non-ionic detergent), A (anionic detergent), C (cationic detergent), Z (zwitter-ionic detergent) and M (detergent mixture);
2. CMC (critical micelle concentration) in H<sub>2</sub>O from [www.anatrace.com](http://www.anatrace.com).
3. Concentration of detergents used during the detergent screen.
4. The intensity of each dot quantified by spot densitometry after Dot blot analysis against rho1D4 tag.
